# Supplementary material
Source: HighWire-hosted journal article supplement (http://d2538ggaoe6cji.cloudfront.net/highwire/filestream/46328/field_highwire_adjunct_files/0/154369-1.pdf)
Supplement: 154369-1.pdf [file 154369-1.pdf]

1 **Figure 2-figure supplement 1**

GREAT Analysis: RPE-specific enhancers

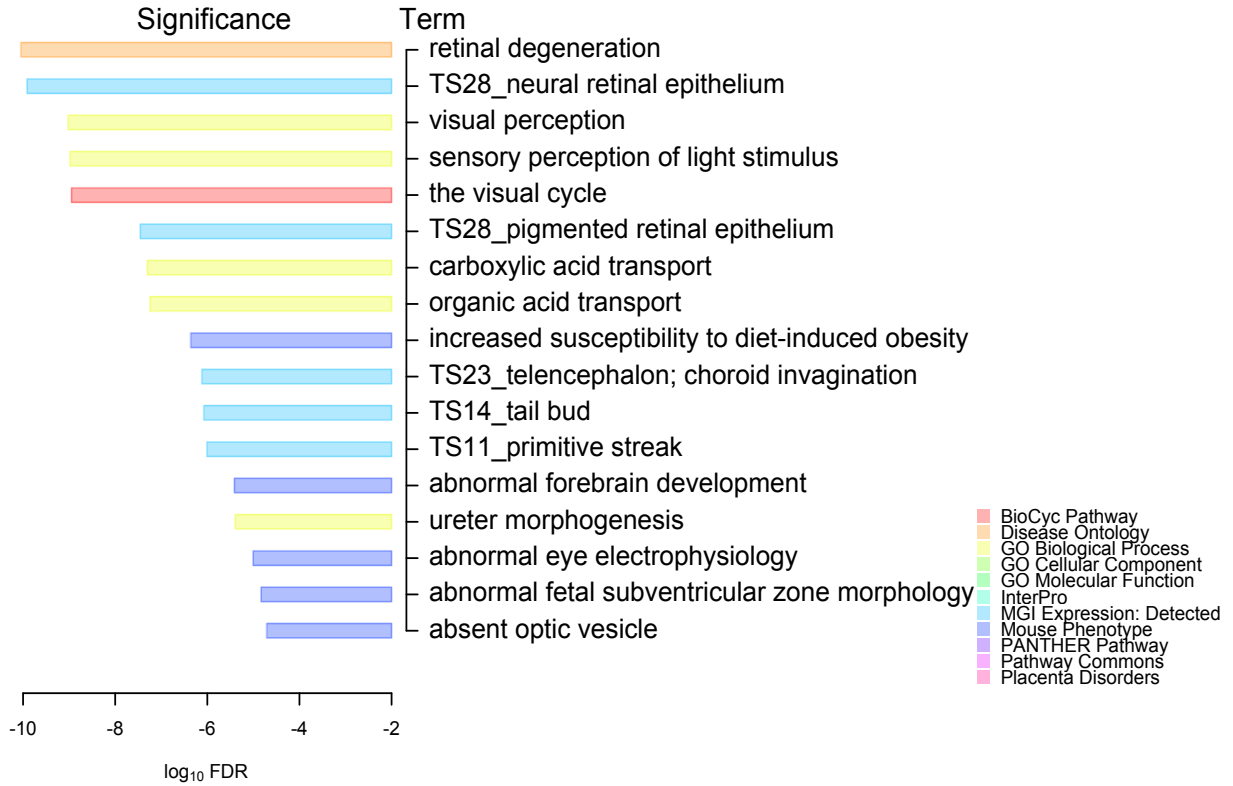

2  
 3 **Figure 2-figure supplement 1.**  
 4 **Functional annotation of genes near putative enhancers present exclusively in control**  
 5 **cobblestone RPE and not in RPE exposed to TGFβ and TNFα.**  
 6 The top over-represented categories belonging to the different ontologies are shown in the  
 7 lower right legend. GO = Gene ontology, MGI = Mouse Genome Informatics. The x axes values  
 8 correspond to the log<sub>10</sub> of false discovery rate.  
 9
